# Supplementary material
Source: PubMed Central journal article supplement (PMC1808029)

**A**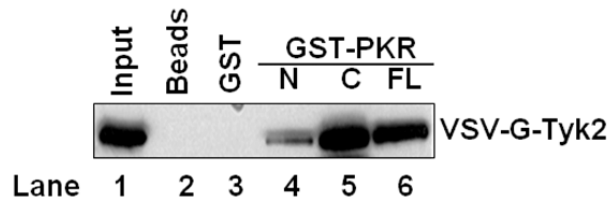**B**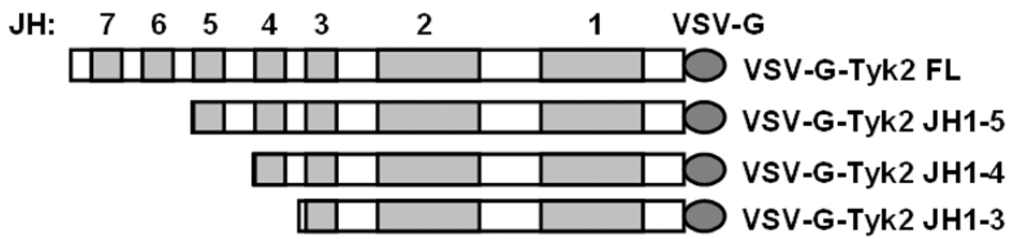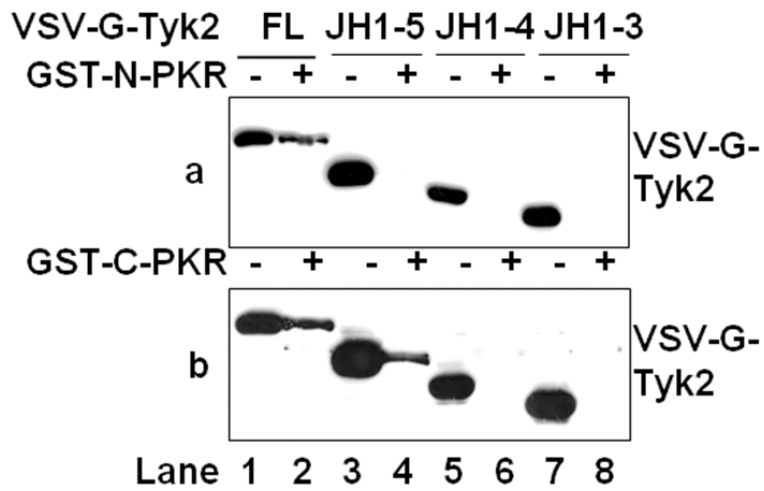**C**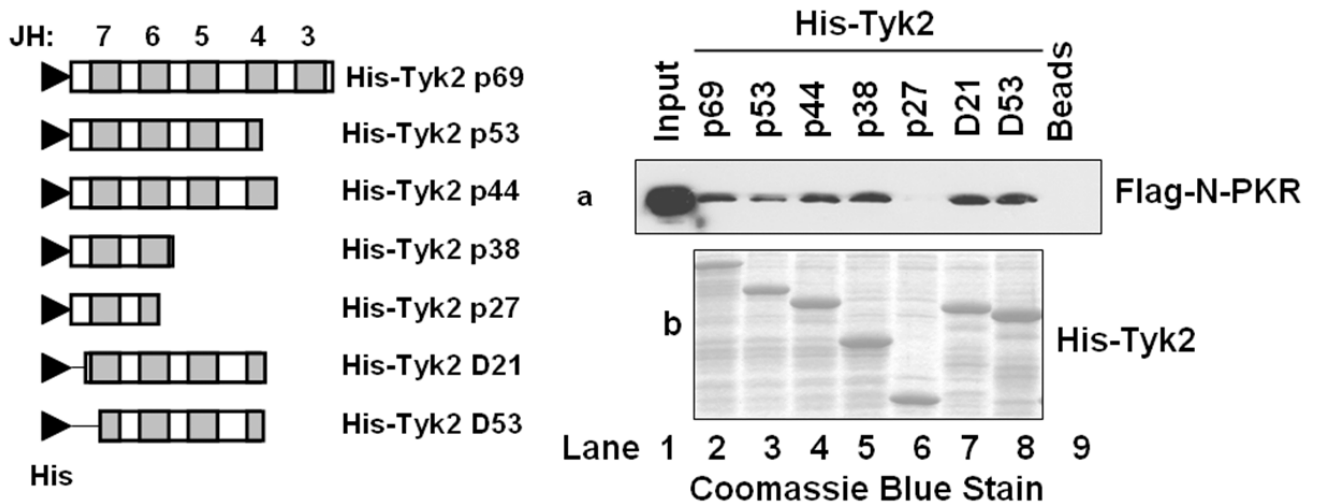

Supplement: 7400891-s2.pdf [file 7400891-s2.pdf]

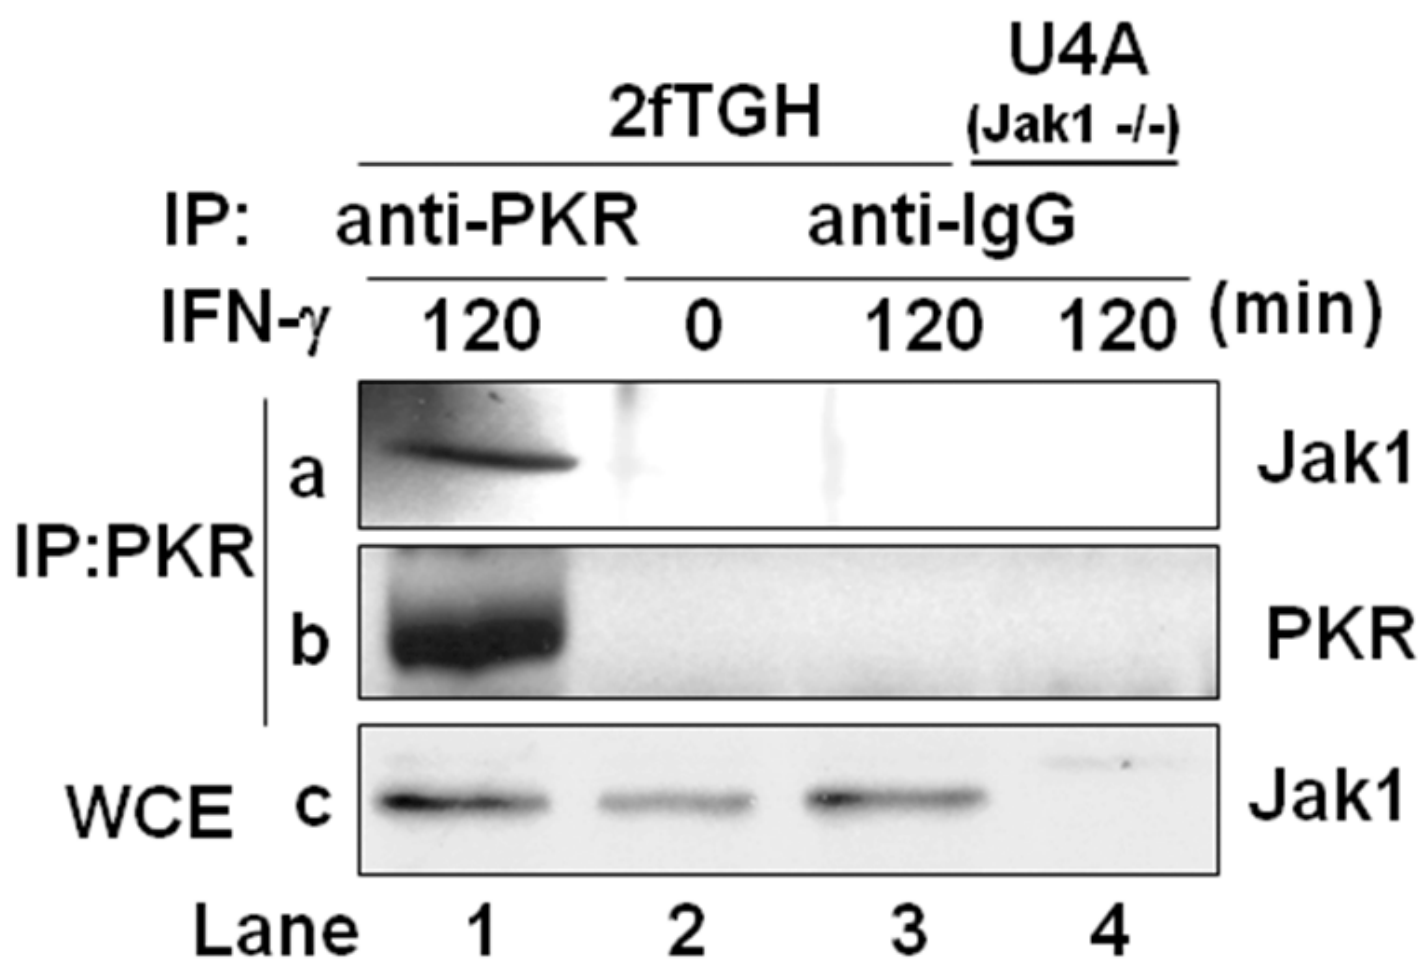

Supplement: 7400891-s3.pdf [file 7400891-s3.pdf]

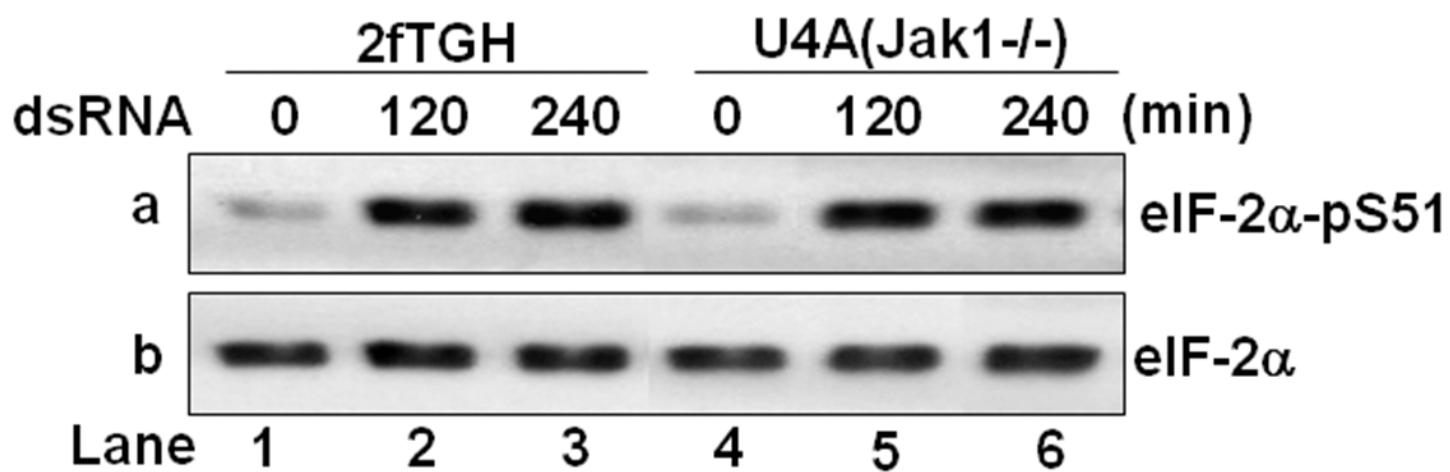

Supplement: 7400891-s4.pdf [file 7400891-s4.pdf]
